# Supplementary material for: Can Differently Stabilized Silver Nanoparticles Modify Calcium Phosphate Precipitation?
Source: MDPI journal article supplement (doi:10.3390/ma16051764), 2023-02-21
Supplement: s1 [file s1]

Supplementary information for

# Can Differently Stabilized Silver Nanoparticles Modify Calcium Phosphate Precipitation?

Suzana Inkret <sup>1</sup>, Marija Ćurlin <sup>2</sup>, Kristina Smokrović <sup>3</sup>, Nikolina Kalčec <sup>4</sup>, Nikolina Peranić <sup>4</sup>, Nadica Maltar-Strmečki <sup>3</sup>, Darija Domazet Jurašin <sup>1</sup> and Maja Dutour Sikirić <sup>1,\*</sup>

<sup>1</sup> Laboratory for Biocolloids and Surface Chemistry, Division of Physical Chemistry, Ruđer Bošković Institute, Bijenička c. 54, 10000 Zagreb, Croatia

<sup>2</sup> School of Medicine, Catholic University of Croatia, 10000 Zagreb, Croatia

<sup>3</sup> Laboratory for Electron Spin Spectroscopy, Division of Physical Chemistry, Ruđer Bošković Institute, Bijenička c. 54, 10000 Zagreb, Croatia

<sup>4</sup> Institute for Medical Research and Occupational Health, Ksaverska cesta 2, 10000 Zagreb, Croatia

\* Correspondence: sikiric@irb.hr; Tel.: + 385-1-456-0941

## Content of listed material

**Figure S1.** FTIR spectra of phosphate band region and corresponding first- and second-order differentiated spectra of precipitates obtained after 10 minutes reaction time in the control system and in the presence of silver nanoparticles stabilized with citrate, poly(vinylpyrrolidone), and sodium bis(2-ethylhexyl) sulfosuccinate.

**Figure S2.** FTIR spectra of phosphate band region and corresponding first- and second-order differentiated spectra of precipitates obtained after 60 minutes reaction time in the control system and in the presence of silver nanoparticles stabilized with citrate, poly(vinylpyrrolidone), and sodium bis(2-ethylhexyl) sulfosuccinate.

**Figure S3.** TGA curves of the stabilizing agents used for synthesis of silver nanoparticles.

**Citation:** Inkret, S.; Ćurlin, M.; Smokrović, K.; Kalčec, N.; Peranić, N.; Maltar-Strmečki, N.; Domazet Jurašin, D.; Dutour Sikirić, M. Can Differently Stabilized Silver Nanoparticles Modify Calcium Phosphate Precipitation? *Materials* **2023**, *16*, 1764. <https://doi.org/10.3390/ma16051764>

Academic Editor: Nikolaos Bouropoulos

Received: 24 January 2023

Revised: 17 February 2023

Accepted: 19 February 2023

Published: 21 February 2023

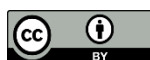

**Copyright:** © 2023 by the author. Licensee MDPI, Basel, Switzerland. This article is an open access article distributed under the terms and conditions of the Creative Commons Attribution (CC BY) license (<https://creativecommons.org/licenses/by/4.0/>).

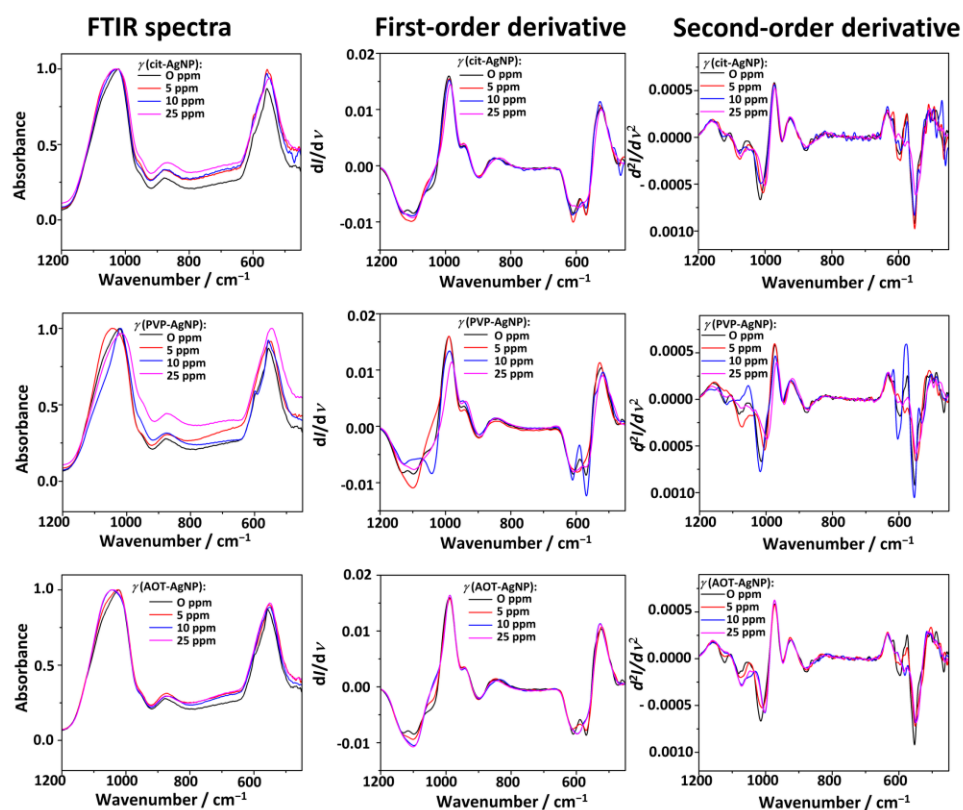

**Figure S1.** FTIR spectra of phosphate band region and corresponding first- and second-order differentiated spectra of precipitates obtained after 10 minutes reaction time in the control system and in the presence of different concentrations of silver nanoparticles (AgNPs) stabilized with citrate (cit-AgNPs), poly(vinylpyrrolidone) (PVP-AgNPs), and sodium bis(2-ethylhexyl) sulfosuccinate (AOT-AgNPs).  $c(\text{CaCl}_2) = c(\text{Na}_2\text{HPO}_4) = 4 \cdot 10^{-3} \text{ mol dm}^{-3}$ , pH 7.4, 25 °C.

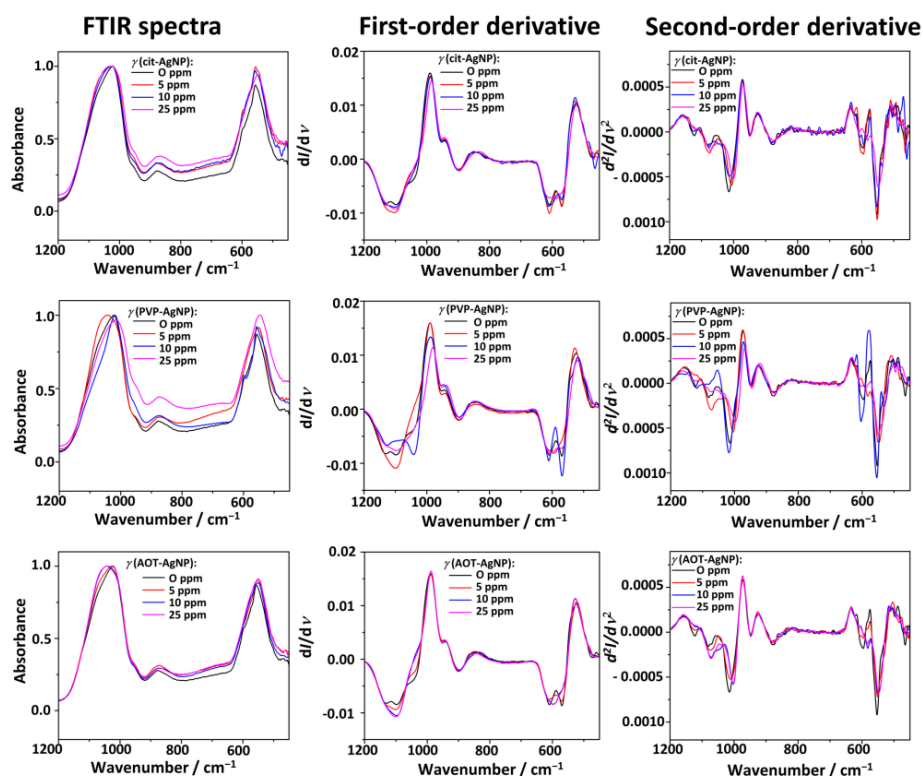

**Figure S2.** FTIR spectra of phosphate band region and corresponding first- and second-order differentiated spectra of precipitates obtained after 60 minutes reaction time in the control system and in the presence of different concentrations of silver nanoparticles (AgNPs) stabilized with citrate (cit-AgNPs), poly(vinylpyrrolidone) (PVP-AgNPs), and sodium bis(2-ethylhexyl) sulfosuccinate (AOT-AgNPs).  $c(\text{CaCl}_2) = c(\text{Na}_2\text{HPO}_4) = 4 \cdot 10^{-3} \text{ mol dm}^{-3}$ , pH 7.4, 25 °C.

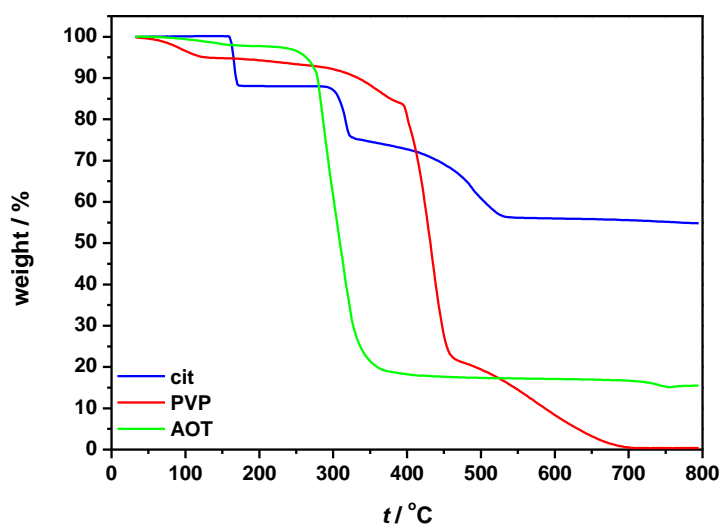

**Figure S3.** TGA curves of the stabilizing agents used for synthesis of silver nanoparticles: citrate (cit), poly(vinylpyrrolidone) (PVP), and sodium bis(2-ethylhexyl) sulfosuccinate (AOT).
